# Supplementary material for: Hydrogen acts as a therapeutic antioxidant by selectively reducing cytotoxic oxygen radicals
Source: Springer Nature journal article supplement (doi:10.1038/nm1577), 2007-05-07
Supplement: 41591_2007_BFnm1577_MOESM18_ESM.pdf [file 41591_2007_BFnm1577_MOESM18_ESM.pdf]

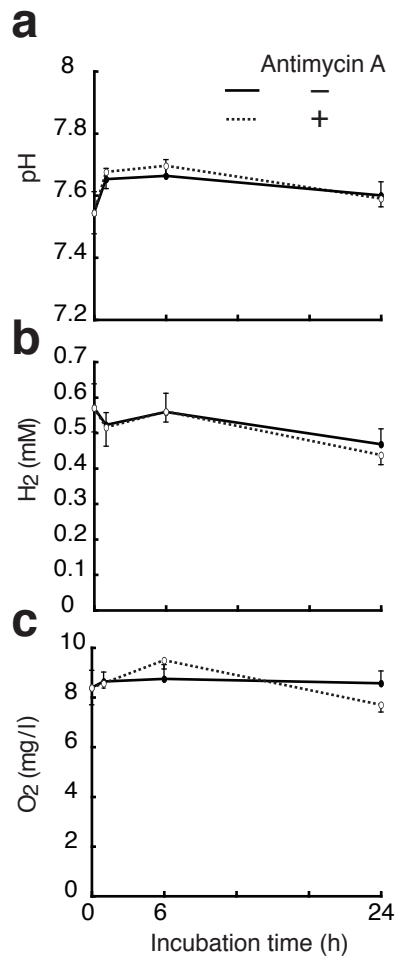

**Supplementary Figure 2 pH, H<sub>2</sub> and O<sub>2</sub> maintain constant in culture medium in a closed flask filled with a mixed gas.**

DMEM culture medium with dissolved H<sub>2</sub> and O<sub>2</sub> was prepared as described in **Methods**. PC12 cells ( $5 \times 10^5$ ) were cultured in medium with or without antimycin A (10  $\mu$ g/ml) in a closed culture flask (25 cm<sup>2</sup>) filled with a mixed gas composed of 75% of H<sub>2</sub>, 20% of O<sub>2</sub> and 5% of CO<sub>2</sub>. At the indicated time, pH, H<sub>2</sub> or O<sub>2</sub> in the medium was monitored with a pH meter, H<sub>2</sub> or O<sub>2</sub> electrode. One flask was used for one measurement. Data show the mean  $\pm$  SD ( $n = 4$ ).
