# Supplementary material for: Hydrogen acts as a therapeutic antioxidant by selectively reducing cytotoxic oxygen radicals
Source: Springer Nature journal article supplement (doi:10.1038/nm1577), 2007-05-07
Supplement: 41591_2007_BFnm1577_MOESM19_ESM.pdf [file 41591_2007_BFnm1577_MOESM19_ESM.pdf]

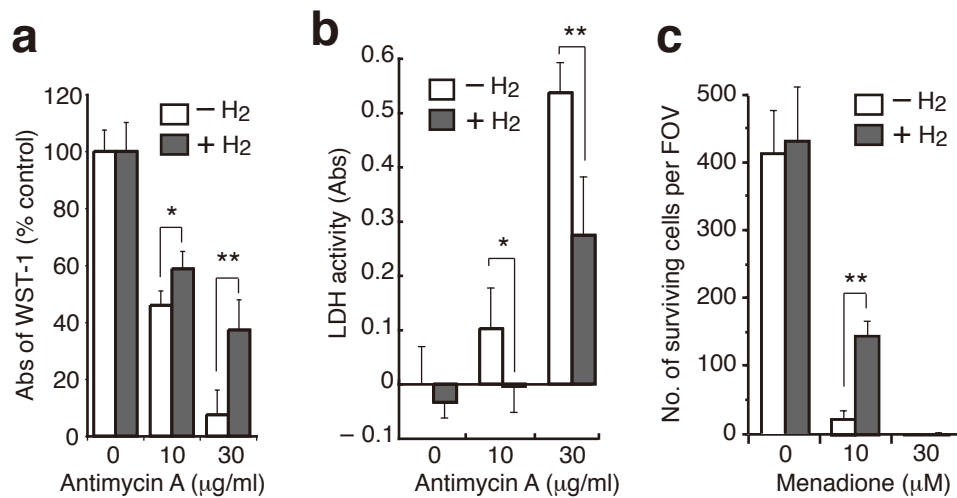

**Supplementary Figure 3 Several methods confirm protection of cells by H<sub>2</sub> against oxidative stress.**

PC12 cells incubated in the presence of or absence of 0.6 mM H<sub>2</sub> were treated with the indicated concentration of antimycin A (**a**, **b**) or menadione (**c**), and maintained with each H<sub>2</sub> concentration for 24 h as described in **Methods**. (**a**) As another method, a modified MTT assay (WST-1 assay) was applied to the cell system according to a Cell Counting Kit (purchased from Wako) to ensure the protective effect by H<sub>2</sub> against oxidative stress (mean ± SD,  $n = 4$ ). \* $P < 0.05$ , \*\* $P < 0.01$ . (**b**) Lactate dehydrogenase (LDH) activities were measured to estimate cellular LDH leakage from damaged cells according to an LDH-Cytotoxic Test kit (Wako). LDH activity in medium of antimycin A- and H<sub>2</sub>-untreated cells was taken as the background (mean ± SD,  $n = 4$ ). \* $P < 0.05$ , \*\* $P < 0.01$ . (**c**) Instead of antimycin A, menadione was used to induce oxidative stress for 24 h and living cells were enumerated as described in **Fig. 2f** (mean ± SD,  $n = 4$ ). \*\* $P < 0.01$ .
