# Supplementary material for: Hydrogen acts as a therapeutic antioxidant by selectively reducing cytotoxic oxygen radicals
Source: Springer Nature journal article supplement (doi:10.1038/nm1577), 2007-05-07
Supplement: 41591_2007_BFnm1577_MOESM21_ESM.pdf [file 41591_2007_BFnm1577_MOESM21_ESM.pdf]

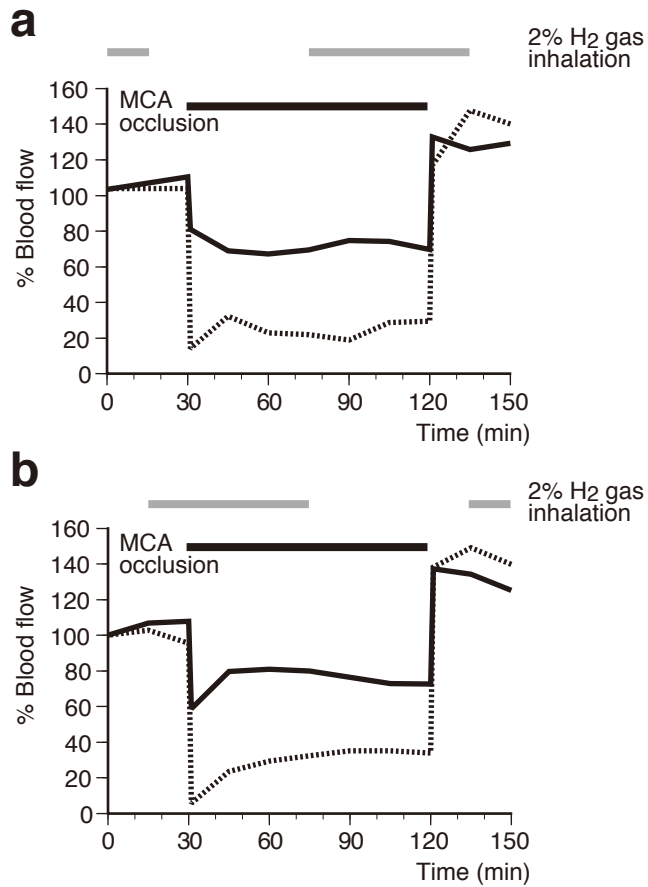

**Supplementary Figure 5 Cerebral blood flow is not influenced by H<sub>2</sub> inhalation.**

Middle cerebral artery occlusion was produced as described in **Methods**. Cerebral blood flow was measured by laser Doppler flowmetry using an ALF21 (ADVANCE Co.) at 2 mm lateral to the bregma for penumbra (solid line) and 5 mm lateral to the bregma for ischemic core (dotted line). Periods of 2% H<sub>2</sub> inhalation and middle cerebral artery (MCA) occlusion are shown by grey and solid thick lines, respectively.
