# Supplementary material for: Hydrogen acts as a therapeutic antioxidant by selectively reducing cytotoxic oxygen radicals
Source: Springer Nature journal article supplement (doi:10.1038/nm1577), 2007-05-07
Supplement: 41591_2007_BFnm1577_MOESM22_ESM.pdf [file 41591_2007_BFnm1577_MOESM22_ESM.pdf]

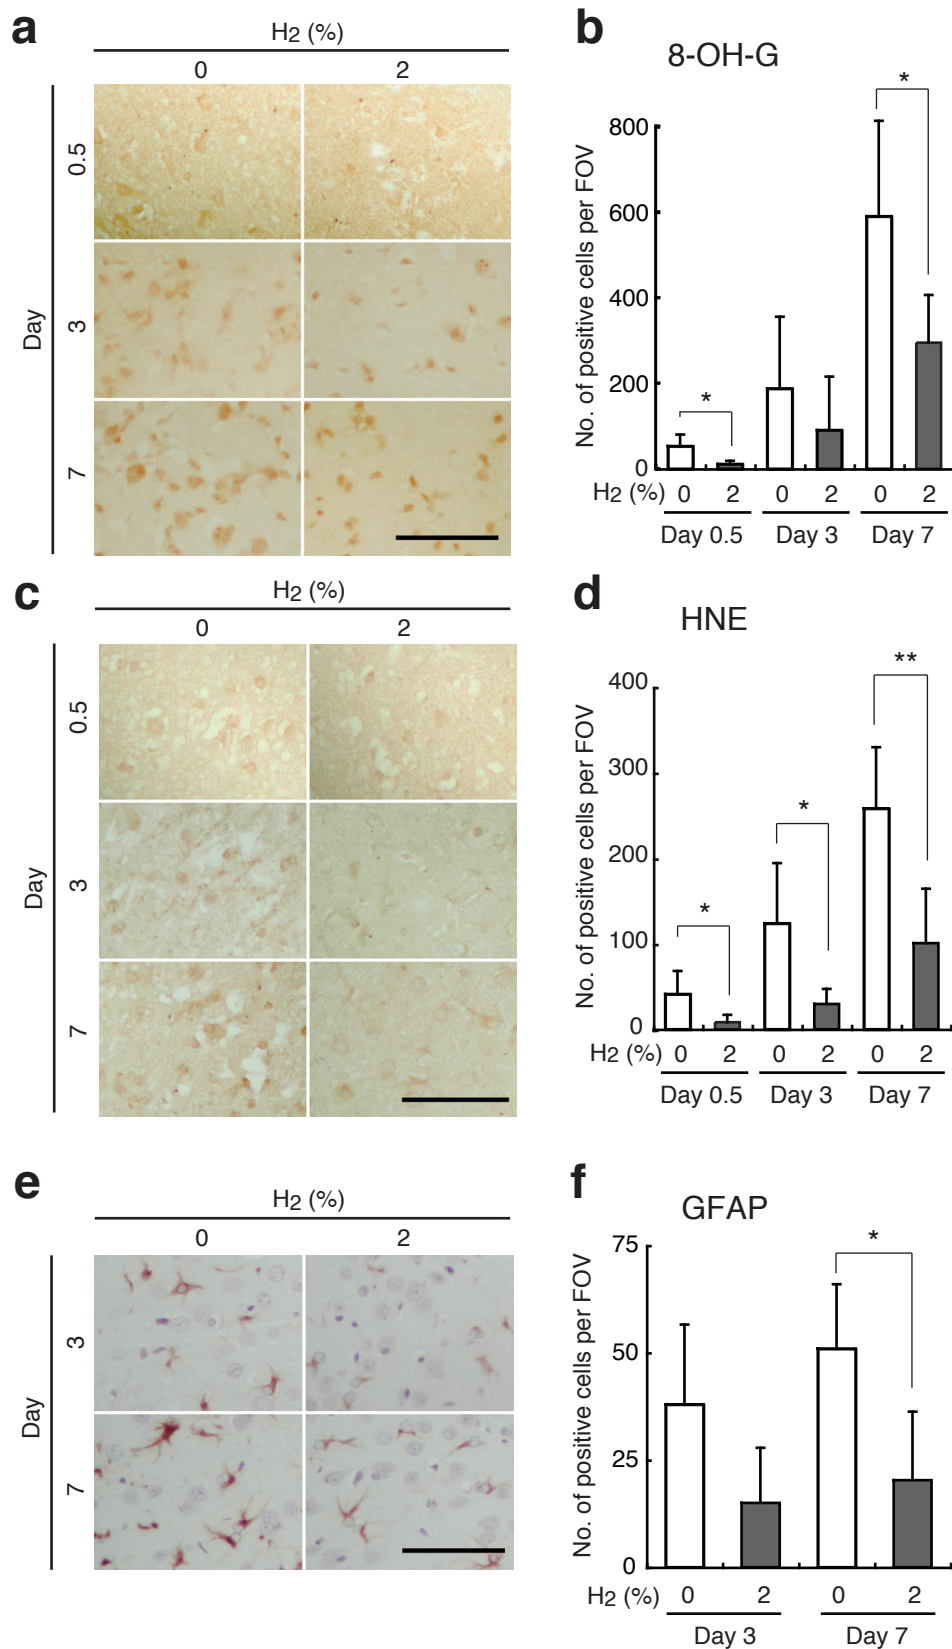

**Supplementary Figure 6 The brain after induction of ischemia reperfusion injury with or without H<sub>2</sub> treatment was immunostained.**

Twelve h (0.5 d), 3 or 7 d after MCA occlusion, the brains were fixed and embedded in paraffin. Coronal 6- $\mu$ m-sections were stained with antibody to 8-OH-G in the ischemic penumbra area in the temporal cortex (a), with antibody to HNE in the ischemic penumbra area in the temporal cortex (c), and with antibody to GFAP in the ischemic penumbra area in the occipital cortex (e). Scale bar: 100  $\mu$ m. Positive cells with antibodies to 8-OH-G (b), HNE (d) and GFAP (f) per field of view (FOV) were counted in exactly the same regions in a blinded manner (mean  $\pm$  SD,  $n = 6$ ). \* $P < 0.05$ , \*\* $P < 0.01$ .
