# Supplementary material for: Hydrogen acts as a therapeutic antioxidant by selectively reducing cytotoxic oxygen radicals
Source: Springer Nature journal article supplement (doi:10.1038/nm1577), 2007-05-07
Supplement: 41591_2007_BFnm1577_MOESM23_ESM.pdf [file 41591_2007_BFnm1577_MOESM23_ESM.pdf]

**Supplementary Table 1**

Physiological parameters during cerebral ischemia reperfusion

| preischemia       |            |      |                  |                 |                 |                 | ischemia          |            |      |                  |                 |                 |                 |
|-------------------|------------|------|------------------|-----------------|-----------------|-----------------|-------------------|------------|------|------------------|-----------------|-----------------|-----------------|
| 0% H <sub>2</sub> |            |      |                  |                 |                 |                 | 0% H <sub>2</sub> |            |      |                  |                 |                 |                 |
| No.               | temp. (°C) | pH   | pCO <sub>2</sub> | pO <sub>2</sub> | glucose (mg/dl) | pressure (mmHg) | No.               | temp. (°C) | pH   | pCO <sub>2</sub> | pO <sub>2</sub> | glucose (mg/dl) | pressure (mmHg) |
| 1                 | 37.4       | 7.47 | 39               | 107             | 120             | 110             | 1                 | 37.4       | 7.42 | 44               | 89              | 130             | 145             |
| 2                 | 37.5       | 7.39 | 51               | 113             | 114             | 95              | 2                 | 37.1       | 7.40 | 51               | 98              | 117             | 120             |
| 3                 | 37.5       | 7.47 | 43               | 109             | 119             | 108             | 3                 | 37.4       | 7.44 | 47               | 115             | 115             | 130             |
| 4                 | 37.4       | 7.46 | 43               | 134             | 120             | 110             | 4                 | 37.0       | 7.42 | 48               | 119             | 117             | 150             |
| 5                 | 37.1       | 7.44 | 40               | 109             | 103             | 110             | 5                 | 37.5       | 7.42 | 42               | 113             | 105             | 150             |
| 6                 | 37.2       | 7.45 | 39               | 125             | 110             | 120             | 6                 | 37.5       | 7.44 | 41               | 112             | 105             | 153             |
| Average           | 37.4       | 7.45 | 43               | 116             | 114             | 109             | Average           | 37.3       | 7.42 | 46               | 108             | 115             | 141             |
| S.D.              | 0.2        | 0.03 | 5                | 11              | 7               | 8               | S.D.              | 0.2        | 0.02 | 4                | 12              | 9               | 13              |
| 2% H <sub>2</sub> |            |      |                  |                 |                 |                 | 2% H <sub>2</sub> |            |      |                  |                 |                 |                 |
| 1                 | 37.1       | 7.45 | 46               | 130             | 109             | 105             | 1                 | 37.3       | 7.41 | 48               | 111             | 120             | 120             |
| 2                 | 37.4       | 7.44 | 50               | 118             | 104             | 87              | 2                 | 37.6       | 7.43 | 43               | 99              | 97              | 135             |
| 3                 | 37.7       | 7.40 | 46               | 105             | 114             | 103             | 3                 | 37.8       | 7.42 | 45               | 104             | 100             | 150             |
| 4                 | 36.9       | 7.45 | 47               | 121             | 107             | 100             | 4                 | 37.0       | 7.39 | 52               | 97              | 105             | 150             |
| 5                 | 37.5       | 7.46 | 41               | 120             | 109             | 100             | 5                 | 37.3       | 7.41 | 45               | 109             | 107             | 145             |
| 6                 | 37.0       | 7.46 | 45               | 114             | 107             | 115             | 6                 | 37.5       | 7.42 | 47               | 108             | 113             | 160             |
| Average           | 37.3       | 7.44 | 46               | 118             | 108             | 102             | Average           | 37.4       | 7.41 | 47               | 105             | 107             | 143             |
| S.D.              | 0.3        | 0.02 | 3                | 8               | 3               | 9               | S.D.              | 0.3        | 0.01 | 3                | 6               | 8               | 14              |
| 4% H <sub>2</sub> |            |      |                  |                 |                 |                 | 4% H <sub>2</sub> |            |      |                  |                 |                 |                 |
| 1                 | 37.6       | 7.48 | 36               | 118             | 113             | 120             | 1                 | 37.0       | 7.40 | 48               | 110             | 105             | 145             |
| 2                 | 37.2       | 7.45 | 40               | 134             | 96              | 112             | 2                 | 36.8       | 7.40 | 46               | 107             | 94              | 120             |
| 3                 | 37.6       | 7.46 | 43               | 119             | 90              | 125             | 3                 | 37.0       | 7.41 | 47               | 83              | 91              | 130             |
| 4                 | 36.7       | 7.46 | 39               | 128             | 103             | 120             | 4                 | 37.6       | 7.43 | 43               | 111             | 97              | 145             |
| 5                 | 36.8       | 7.43 | 45               | 111             | 97              | 120             | 5                 | 37.4       | 7.45 | 44               | 105             | 100             | 140             |
| 6                 | 37.5       | 7.49 | 34               | 127             | 103             | 100             | 6                 | 37.4       | 7.44 | 46               | 110             | 105             | 150             |
| Average           | 37.2       | 7.46 | 40               | 123             | 100             | 116             | Average           | 37.2       | 7.42 | 46               | 104             | 99              | 138             |
| S.D.              | 0.4        | 0.02 | 4                | 8               | 8               | 9               | S.D.              | 0.3        | 0.02 | 0                | 11              | 6               | 11              |

| reperfusion for 15 min |            |      |                  |                 |                 |                 | reperfusion for 30 min |            |      |                  |                 |                 |                 |
|------------------------|------------|------|------------------|-----------------|-----------------|-----------------|------------------------|------------|------|------------------|-----------------|-----------------|-----------------|
| 0% H <sub>2</sub>      |            |      |                  |                 |                 |                 | 0% H <sub>2</sub>      |            |      |                  |                 |                 |                 |
| No.                    | temp. (°C) | pH   | pCO <sub>2</sub> | pO <sub>2</sub> | glucose (mg/dl) | pressure (mmHg) | No.                    | temp. (°C) | pH   | pCO <sub>2</sub> | pO <sub>2</sub> | glucose (mg/dl) | pressure (mmHg) |
| 1                      | 37.3       | 7.39 | 45               | 101             | 132             | 155             | 1                      | 37.5       | 7.41 | 41               | 110             | 135             | 140             |
| 2                      | 37.2       | 7.40 | 52               | 94              | 108             | 135             | 2                      | 37.4       | 7.40 | 49               | 97              | 111             | 130             |
| 3                      | 37.3       | 7.46 | 44               | 105             | 113             | 135             | 3                      | 37.0       | 7.40 | 51               | 109             | 115             | 118             |
| 4                      | 37.5       | 7.43 | 46               | 119             | 116             | 153             | 4                      | 37.5       | 7.42 | 46               | 99              | 118             | 135             |
| 5                      | 37.2       | 7.40 | 44               | 122             | 104             | 155             | 5                      | 37.1       | 7.43 | 40               | 134             | 105             | 130             |
| 6                      | 37.7       | 7.41 | 43               | 107             | 105             | 140             | 6                      | 37.7       | 7.35 | 50               | 93              | 97              | 110             |
| Average                | 37.4       | 7.42 | 46               | 108             | 113             | 146             | Average                | 37.4       | 7.40 | 46               | 107             | 114             | 127             |
| S.D.                   | 0.2        | 0.03 | 3                | 11              | 10              | 10              | S.D.                   | 0.3        | 0.03 | 5                | 15              | 13              | 11              |
| 2% H <sub>2</sub>      |            |      |                  |                 |                 |                 | 2% H <sub>2</sub>      |            |      |                  |                 |                 |                 |
| 1                      | 37.5       | 7.42 | 42               | 107             | 120             | 120             | 1                      | 37.4       | 7.39 | 45               | 116             | 115             | 100             |
| 2                      | 37.5       | 7.41 | 45               | 98              | 100             | 95              | 2                      | 37.4       | 7.43 | 42               | 97              | 103             | 90              |
| 3                      | 37.2       | 7.40 | 46               | 109             | 111             | 150             | 3                      | 37.0       | 7.38 | 48               | 117             | 112             | 150             |
| 4                      | 37.4       | 7.39 | 49               | 100             | 110             | 108             | 4                      | 37.3       | 7.36 | 53               | 109             | 110             | 110             |
| 5                      | 37.3       | 7.40 | 45               | 108             | 107             | 130             | 5                      | 37.5       | 7.37 | 46               | 119             | 107             | 95              |
| 6                      | 37.1       | 7.39 | 49               | 113             | 105             | 130             | 6                      | 37.2       | 7.38 | 51               | 115             | 109             | 125             |
| Average                | 37.3       | 7.40 | 46               | 106             | 109             | 122             | Average                | 37.3       | 7.39 | 48               | 112             | 109             | 112             |
| S.D.                   | 0.2        | 0.01 | 3                | 6               | 7               | 19              | S.D.                   | 0.18       | 0.02 | 4                | 8               | 4               | 23              |
| 4% H <sub>2</sub>      |            |      |                  |                 |                 |                 | 4% H <sub>2</sub>      |            |      |                  |                 |                 |                 |
| 1                      | 37.4       | 7.39 | 49               | 103             | 111             | 140             | 1                      | 37.1       | 7.43 | 37               | 142             | 107             | 125             |
| 2                      | 37.3       | 7.36 | 49               | 93              | 96              | 120             | 2                      | 37.4       | 7.29 | 41               | 133             | 96              | 112             |
| 3                      | 37.4       | 7.39 | 46               | 90              | 92              | 135             | 3                      | 37.5       | 7.39 | 47               | 93              | 90              | 135             |
| 4                      | 37.4       | 7.41 | 45               | 113             | 96              | 145             | 4                      | 37.4       | 7.39 | 45               | 134             | 100             | 130             |
| 5                      | 37.1       | 7.43 | 45               | 107             | 98              | 140             | 5                      | 37.1       | 7.40 | 44               | 138             | 100             | 125             |
| 6                      | 37.3       | 7.42 | 44               | 120             | 97              | 150             | 6                      | 37.1       | 7.40 | 47               | 143             | 94              | 140             |
| Average                | 37.3       | 7.40 | 46               | 104             | 98              | 138             | Average                | 37.3       | 7.38 | 44               | 131             | 98              | 128             |
| S.D.                   | 0.12       | 0.03 | 2                | 12              | 7               | 10              | S.D.                   | 0.19       | 0.05 | 4                | 19              | 6               | 10              |
